# Supplementary material
Source: PubMed Central journal article supplement (PMC5610492)
Supplement: AAC.00501-17_zac010176542s1.pdf [file AAC.00501-17_zac010176542s1.pdf]

## Supplemental materials

TABLE S1. Data collection and refinement statistics

|                                                 | Native TLA-3                           | Avibactam complex                      | OP0595 complex                         |
|-------------------------------------------------|----------------------------------------|----------------------------------------|----------------------------------------|
| <b>Data collection</b>                          |                                        |                                        |                                        |
| Beam line                                       | BL2S1 (AichiSR)                        | BL2S1 (AichiSR)                        | BL2S1 (AichiSR)                        |
| Wavelength (Å)                                  | 1.12                                   | 1.12                                   | 1.12                                   |
| Resolution range (Å)                            | 55.18–1.59<br>(1.68–1.59) <sup>a</sup> | 55.48–1.59<br>(1.68–1.59) <sup>a</sup> | 55.22–2.00<br>(2.11–2.00) <sup>a</sup> |
| Space group                                     | <i>C</i> 2                             | <i>C</i> 2                             | <i>C</i> 2                             |
| <b>Cell dimensions</b>                          |                                        |                                        |                                        |
| <i>a</i> (Å)                                    | 94.8                                   | 95.9                                   | 95.2                                   |
| <i>b</i> (Å)                                    | 67.9                                   | 68.1                                   | 67.9                                   |
| <i>c</i> (Å)                                    | 45.1                                   | 45.3                                   | 45.3                                   |
| $\alpha$ (°)                                    | 90.0                                   | 90.0                                   | 90.0                                   |
| $\beta$ (°)                                     | 94.2                                   | 94.5                                   | 94.6                                   |
| $\gamma$ (°)                                    | 90.0                                   | 90.0                                   | 90.0                                   |
| No. of unique reflections                       | 38203 (5557) <sup>a</sup>              | 38600 (5528) <sup>a</sup>              | 18894 (2688) <sup>a</sup>              |
| Redundancy                                      | 7.1 (6.9) <sup>a</sup>                 | 7.1 (7.0) <sup>a</sup>                 | 7.5 (7.6) <sup>a</sup>                 |
| Completeness (%)                                | 99.8 (99.6) <sup>a</sup>               | 98.8 (97.7) <sup>a</sup>               | 97.0 (95.6) <sup>a</sup>               |
| $R_{\text{merge}}$ (%)                          | 5.1 (18.1) <sup>a</sup>                | 4.4 (20.4) <sup>a</sup>                | 7.4 (29.5) <sup>a</sup>                |
| mean $I/\sigma(I)$                              | 24.7 (9.4) <sup>a</sup>                | 28.1 (8.8) <sup>a</sup>                | 20.0 (6.6) <sup>a</sup>                |
| <b>Refinement</b>                               |                                        |                                        |                                        |
| $R_{\text{working}}$ (%)                        | 13.5                                   | 15.9                                   | 16.1                                   |
| $R_{\text{free}}$ (%)                           | 16.0                                   | 19.2                                   | 20.9                                   |
| <b>Ramachandran statistics (%)</b>              |                                        |                                        |                                        |
| Favored                                         | 98.2                                   | 98.5                                   | 96.3                                   |
| Allowed                                         | 1.8                                    | 1.5                                    | 3.7                                    |
| Disallowed                                      | 0                                      | 0                                      | 0                                      |
| <b>Average <i>B</i>-factors (Å<sup>2</sup>)</b> |                                        |                                        |                                        |
| Protein                                         | 13.6                                   | 17.5                                   | 20.5                                   |
| Ligand/ion                                      | 26.3                                   | 24.8                                   | 36.2                                   |
| Water                                           | 26.3                                   | 29.3                                   | 25.0                                   |
| <b>r.m.s.d.</b>                                 |                                        |                                        |                                        |
| Bond lengths (Å)                                | 0.012                                  | 0.011                                  | 0.013                                  |
| Bond angles (°)                                 | 1.506                                  | 1.470                                  | 1.477                                  |

<sup>a</sup>Values in parentheses are for the highest-resolution shell.



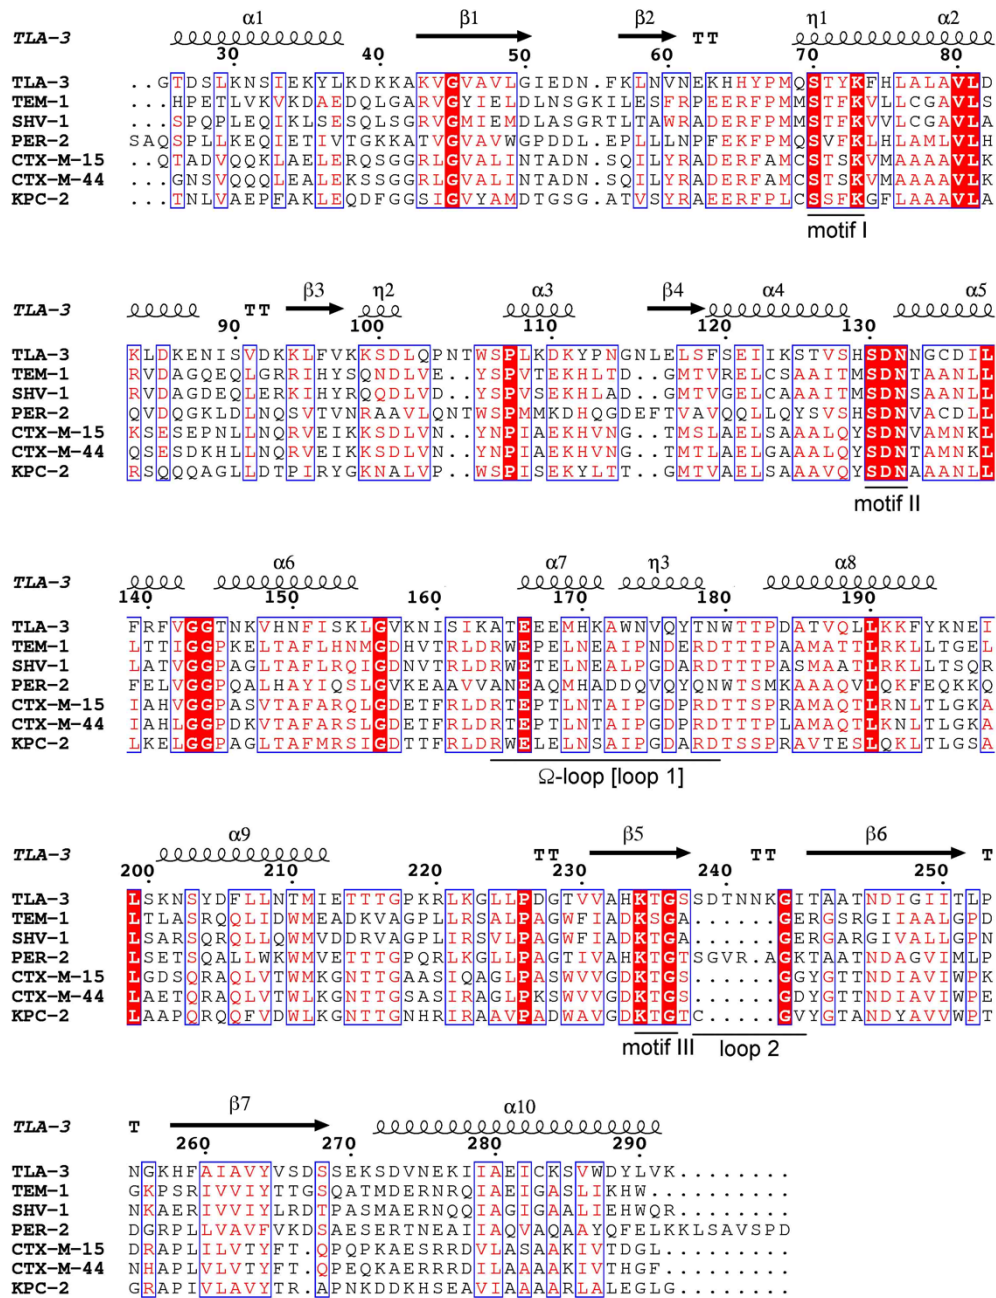

**Fig. S2**

**Figure S2.** Amino acid alignments of class A β-lactamases for which three-dimensional structures have been determined. The strictly conserved amino acid residues are boxed in red. Physicochemically similar amino acids are shown in red. The secondary structure elements of TLA-3 are shown above the alignments. The figure was prepared using ClustalW (<http://clustalw.ddbj.nig.ac.jp>) and ESPrift 3.0 (<http://esprift.ibcp.fr/ESPrift/ESPrift/>).
